# Supplementary material for: Preoperative serum lipids as novel predictors for concomitant thyroid carcinoma in Graves’ disease
Source: PeerJ. 2025 Aug 28;13:e19915. doi: 10.7717/peerj.19915 (PMC12399084; doi:10.7717/peerj.19915)
Supplement: Supplemental Information 1 [file peerj-13-19915-s001.xlsx]

## Sheet: primary_data
ID	group	age	gender	hypertension	Diabetes	Drinking	Smoking	Duration of GD (months)	overweight	TAG_level	TC_level	HDL_level	LDL_level	VLDL	TSH level	Trab level	Nodules in thyroid	Aspect ratio imbalance	Irregular borders	Irregular shape	Hypoechogenicity	Microcalcifications	sumor_size	Multifocality	ETE	Bilaterality	LNM	cancer
1	0	75	1	0	1	0	0	72	0	1	0	0	0	1	0	1	1	0	0	0	1	0	1	0	0	0	0	1
2	0	66	0	0	0	0	0	84	0	1	1	0	1	1	0	1	1	0	0	0	1	0						0
3	0	49	1	0	1	1	0	360	0	0	0	0	0	1	2	1	1	0	1	0	0	0	0	0	0	0	0	1
4	0	26	0	0	0	0	0	60	1	0	0	1	0	0	0	0	1	0	0	0	0	0						0
5	0	46	0	1	0	0	0	8	0	1	1	1	1	1	0	1	1	1	1	1	1	1	0	0	0	0	1	1
6	0	58	0	1	0	0	0	12	1	0	0	1	0	0	1	1	1	1	1	0	1	0	0	0	0	0	0	1
7	0	40	0	0	0	0	0	6	0	1	1	0	1	1	1	1	1	1	1	0	0	0	1	1	0	1	1	1
8	0	72	0	1	0	0	0	480	0	0	1	1	1	1	2	1	1	0	0	1	1	0						0
9	0	32	1	0	0	0	0	84	0	1	1	0	1	1	1	1	1	0	0	0	1	0	0	0	1	0	1	1
10	0	67	1	1	0	0	0	36	0	1	1	0	1	1	0	1	1	0	0	0	1	0	0	0	0	0	0	1
12	0	40	1	0	0	0	0	48	0	0	0	1	0	0	0	1	1	0	0	0	0	0	0	0	0	0	0	1
13	0	63	0	0	1	0	0	180	0	0	1	1	1	0	1	1	1	0	1	0	0	0						0
15	0	45	0	0	0	0	0	2	1	0	1	1	1	0	0	1	1	0	0	0	0	0	1	0	1	0	0	1
16	0	31	0	0	0	0	0	6	0	0	0	0	0	0	1	0	1	0	0	0	0	0						0
18	0	62	0	0	0	0	0	6	1	0	1	1	0	0	1	1	1	0	0	1	0	0						0
19	0	39	0	0	0	0	0	12	0	0	1	1	0	0	1	0	1	0	0	0	0	0						0
20	0	32	0	0	0	0	0	216	0	0	1	0	1	0	1	1	1	0	0	0	1	0						0
21	0	54	1	0	0	1	1	216	0	1	1	1	0	1	0	1	1	0	1	0	1	1	1	0	0	0	1	1
22	0	26	0	0	0	0	0	240	0	0	1	1	1	0	2	0	0	0	0	1	0	0						0
23	0	59	0	0	0	0	0	48	0	1	1	1	1	1	1	0	1	0	1	0	0	0						0
24	0	37	0	0	0	0	0	1	0	0	1	1	1	0	0	1	1	0	1	0	1	0						0
26	0	48	1	0	0	0	0	120	0	0	0	0	0	0	0	1	1	0	0	0	0	0						0
27	0	19	0	0	0	0	0	240	0	1	1	1	1	0	2	0	0	0	0	1	0	0						0
28	0	37	1	0	0	0	0	72	0	0	1	0	1	1	0	0	0	0	0	0	0	0						0
29	0	52	0	0	0	0	0	84	1	1	0	0	0	1	1	1	1	0	1	0	1	0	0	0	0	0	0	1
30	0	19	0	0	0	0	0	204	0	0	0	0	0	1	1	1	0	0	0	0	0	0						0
31	0	54	0	0	0	0	0	84	0	1	1	0	1	1	0	0	1	0	0	1	1	0	0	0	0	0	0	1
32	0	51	0	0	0	0	0	84	0	0	1	1	1	1	2	1	1	0	0	0	0	0						0
33	0	24	0	0	0	0	0	12	0	0	1	1	0	0	1	1	1	0	0	0	0	0						0
34	0	23	0	0	0	0	0	120	0	0	1	1	0	0	1	1	1	0	0	0	0	0						0
35	0	41	0	0	0	0	0	96	1	1	0	0	0	1	1	1	1	1	0	0	1	0	0	0	0	0	0	1
36	0	27	0	0	0	0	0	3	0	1	1	0	0	1	0	1	1	0	0	0	0	0						0
37	0	55	1	0	0	0	1	36	0	1	0	0	0	1	2	1	1	1	1	1	0	0	0	0	0	0	1	1
38	0	35	1	0	0	0	0	4	1	1	1	0	1	1	0	0	1	0	0	0	0	1	0	0	0	0	1	1
39	0	41	0	0	0	0	0	3	0	0	1	1	1	0	2	1	1	1	1	0	1	0	1	1	1	1	0	1
40	0	42	0	0	0	0	0	36	1	0	1	1	1	0	0	1	1	0	0	0	1	0	0	0	1	0	1	1
41	0	63	0	1	0	0	0	72	0	0	0	1	0	0	0	1	1	0	1	0	1	0						0
42	0	69	0	0	0	0	0	24	0	0	1	0	0	0	1	1	1	0	0	0	0	0						0
43	0	51	0	0	0	0	0	120	1	0	1	1	1	0	0	1	1	0	1	0	1	0	0	0	0	0	0	1
44	0	62	0	1	0	0	0	2	0	1	1	1	1	1	0	1	1	1	1	0	0	0	0	1	0	1	0	1
45	0	52	0	0	0	0	0	24	0	1	1	0	1	1	2	1	1	0	0	0	1	0	1	1	0	1	0	1
46	0	27	0	0	0	0	0	36	1	1	1	1	1	1	0	1	1	0	0	1	1	0	1	0	1	0	1	1
48	0	29	0	0	0	0	0	3	0	1	1	0	1	1	0	1	1	0	1	1	1	0	1	0	1	0	0	1
49	0	49	0	0	0	0	0	2	0	0	1	1	1	0	0	0	1	0	0	1	0	0	0	0	0	0	0	1
50	0	51	0	0	0	0	0	12	0	1	1	1	1	0	1	1	1	0	1	0	0	0	0	1	0	1	0	1
51	0	54	0	0	0	0	0	3	1	1	1	1	0	1	0	1	1	0	0	1	0	0						0
52	0	33	0	0	0	0	0	12	1	1	1	1	0	0	2	1	1	1	0	0	1	1	0	0	0	0	1	1
53	0	42	0	0	0	0	0	2	0	1	1	1	1	1	0	1	1	1	0	0	1	0	0	0	1	0	1	1
55	0	47	0	0	0	0	0	1	0	0	1	1	0	0	1	1	1	0	0	0	0	0						0
56	0	24	0	0	0	0	0	36	0	0	1	1	0	0	0	1	1	0	0	0	1	0						0
57	0	52	0	0	0	0	0	6	0	1	1	1	1	0	0	1	1	0	0	0	0	0						0
59	0	35	0	0	0	0	0	36	0	0	0	0	0	0	0	1	1	0	1	1	1	0	0	0	0	0	0	1
60	0	37	0	0	0	0	0	24	0	0	1	1	1	0	1	1	1	0	1	1	0	0						0
61	0	59	0	0	0	0	0	10	0	0	1	1	1	0	0	1	1	0	0	0	0	0						0
62	0	16	0	0	0	0	0	60	0	1	0	1	0	1	1	1	0	0	0	1	0	0						0
63	0	49	0	0	0	0	0	12	0	0	1	1	1	0	0	1	1	0	0	0	0	0						0
64	0	62	0	0	1	0	0	3	1	1	0	0	0	0	0	1	1	0	0	0	0	0	1	0	0	0	0	1
65	0	27	0	0	0	0	0	24	0	0	1	1	1	0	0	1	0	0	0	1	0	0						0
66	0	31	0	0	0	0	0	12	0	1	1	1	0	1	0	0	1	0	0	0	0	0	0	0	0	0	1	1
67	0	41	0	0	0	0	0	12	0	0	1	1	1	0	0	1	1	0	1	1	1	0	0	1	0	0	0	1
69	0	59	1	0	0	0	0	240	0	1	1	0	0	1	1	1	1	0	0	0	0	0						0
71	0	53	0	0	0	0	0	300	0	0	1	1	1	0	0	1	1	0	0	0	0	0						0
72	0	45	1	0	0	1	1	2	1	1	1	1	1	1	0	1	1	1	1	1	1	0	0	0	0	0	1	1
73	0	64	0	1	0	0	0	12	0	0	1	1	1	1	1	0	1	0	0	0	0	0						0
75	0	48	0	0	0	0	0	60	0	0	1	1	1	0	0	1	1	1	1	1	1	0	0	0	1	0	0	1
77	0	43	0	0	0	0	0	24	1	0	1	1	0	0	1	0	1	0	0	0	0	0						0
78	0	57	0	1	0	0	0	48	1	1	1	1	1	1	1	1	1	1	1	0	1	1	0	1	0	1	1	1
79	0	48	0	1	0	0	0	9	0	1	1	1	1	1	2	1	1	0	0	0	0	0	1	0	0	0	0	1
80	0	69	0	1	0	0	0	5	0	1	1	0	1	1	0	1	1	0	0	1	0	0						0
81	0	41	1	0	0	0	0	24	1	1	1	0	1	1	2	1	1	0	0	0	1	0	0	1	0	1	1	1
82	0	28	0	0	0	0	0	60	0	0	1	1	1	1	2	1	1	0	1	1	1	1	0	0	0	0	1	1
83	0	33	1	0	0	1	0	12	0	1	0	0	0	1	1	0	1	0	1	0	1	0	0	0	0	0	1	1
84	0	76	0	1	0	0	0	24	0	1	0	0	0	0	1	1	1	1	1	0	0	0	1	0	0	0	0	1
87	0	48	1	1	0	0	0	3	1	1	1	0	1	1	0	1	1	0	1	1	1	1	0	0	0	0	0	1
89	0	64	0	1	0	0	0	0.5	0	0	0	0	0	1	0	1	1	0	0	0	0	0						0
90	0	64	0	0	0	0	0	36	1	0	1	1	1	1	0	1	1	0	1	0	0	0	0	0	0	0	0	1
91	0	27	0	0	0	0	0	24	0	0	1	0	1	0	1	0	1	0	0	1	0	0	0	0	0	0	0	1
92	0	50	0	0	0	0	0	60	0	0	1	1	1	0	0	1	1	0	0	0	0	0						0
93	0	52	0	0	0	0	0	12	0	0	0	0	0	0	0	1	1	1	1	1	1	0	1	1	0	0	0	1
94	0	46	0	0	0	0	0	120	1	1	1	0	1	1	0	1	1	1	0	0	0	1	1	1	0	0	1	1
95	0	55	0	1	0	0	0	264	0	1	1	1	1	1	1	1	1	1	1	0	1	0	1	0	0	0	0	1
96	0	50	0	0	0	0	0	1	0	1	1	1	1	1	0	1	1	1	1	1	1	1	0	0	0	0	0	1
97	0	37	0	0	0	0	0	240	0	1	1	0	1	1	2	1	1	0	0	1	0	0	0	1	0	1	0	1
98	0	56	0	0	0	0	0	480	0	0	1	1	1	0	0	0	1	1	1	0	1	0	0	1	0	1	0	1
99	0	36	0	0	0	0	0	6	1	0	1	1	1	1	2	1	0	0	0	0	0	0						0
100	0	31	1	0	0	1	1	60	0	0	1	0	1	0	0	1	0	0	0	0	1	0						0
101	0	42	0	0	0	0	0	24	0	1	1	1	1	1	0	1	1	0	0	1	0	0						0
102	0	20	0	0	0	0	0	120	0	0	1	0	1	0	1	1	0	0	0	0	0	0						0
103	0	25	0	0	0	0	0	120	0	0	1	0	0	0	1	1	1	0	1	0	1	1	0	0	0	0	0	1
104	0	70	0	1	0	0	0	1	0	1	1	0	1	0	0	0	1	1	1	0	0	0	0	1	1	1	1	1
105	0	26	0	0	0	0	0	24	0	0	0	1	0	0	1	0	1	1	0	0	1	0	0	0	0	0	0	1
106	0	28	0	0	0	0	0	12	0	0	0	0	0	1	0	1	1	0	0	0	0	0						0
107	0	54	1	0	1	0	0	120	0	1	0	0	0	1	0	1	1	0	0	0	1	0						0
108	0	35	0	0	0	0	0	3	0	1	0	0	0	1	0	1	1	0	1	0	0	0	1	0	0	0	1	1
109	0	47	1	0	0	0	0	3	1	0	1	0	1	1	2	1	1	1	1	0	1	0	1	1	1	1	1	1
110	0	22	0	0	0	0	0	84	1	0	1	0	0	1	0	1	1	0	1	0	1	0	1	0	0	0	1	1
111	0	27	0	0	0	0	0	48	0	0	0	0	0	0	0	1	1	0	0	1	0	0						0
112	0	45	0	0	0	0	0	48	0	0	1	1	1	1	0	1	1	0	0	0	1	0						0
113	0	53	0	0	0	0	0	36	0	0	1	1	1	0	0	1	1	0	1	0	0	0						0
114	0	49	0	1	0	0	0	12	0	0	1	1	1	1	0	1	1	0	1	0	0	1	0	0	0	0	0	1
115	0	61	0	0	0	0	0	36	0	1	1	0	1	1	1	1	1	0	0	0	1	0						0
116	0	55	0	0	0	0	0	1	0	1	1	1	1	1	0	1	1	1	1	0	1	0	0	0	0	0	0	1
117	0	46	0	0	0	0	0	12	0	1	1	0	0	1	0	1	1	0	0	0	1	0	0	0	0	0	0	1
118	0	28	0	0	0	0	0	4	0	1	1	0	1	1	0	1	0	0	0	0	0	0						0
119	0	55	0	1	0	0	0	2	0	1	1	0	1	1	0	1	1	1	1	0	1	0	1	1	0	1	0	1
120	0	63	0	0	0	0	0	3	0	0	1	1	0	0	0	0	1	0	0	0	1	0						0
121	0	56	0	0	0	0	0	12	0	1	1	0	0	1	0	0	1	1	1	0	1	0	0	0	0	0	0	1
122	0	44	1	0	0	0	0	2	0	1	0	1	0	0	2	1	1	0	1	0	1	0	0	1	0	1	0	1
123	0	58	0	0	0	0	0	24	0	1	1	0	1	1	1	1	1	0	0	0	1	1	1	0	1	0	1	1
124	0	52	0	1	0	0	0	24	0	0	0	0	0	0	1	1	1	0	0	0	0	0	0	0	0	0	1	1
125	0	37	0	0	0	0	0	120	0	0	0	0	0	0	0	0	1	0	0	1	1	0	1	1	0	0	0	1
126	0	61	0	1	0	0	0	2	1	0	1	0	1	1	0	1	1	0	0	0	1	0	0	1	1	0	0	1
127	0	45	0	0	0	0	0	12	1	1	0	0	0	1	1	1	1	1	1	1	1	0	0	0	1	0	0	1
128	0	35	0	0	0	0	0	4	1	1	0	0	0	1	0	1	1	1	1	0	0	0	1	1	1	0	1	1
129	0	38	0	0	0	0	0	120	0	1	1	0	1	1	0	1	1	1	1	0	1	0	1	1	0	1	0	1
130	0	46	0	0	0	0	0	3	0	1	1	1	1	0	2	1	1	1	0	1	1	0	0	0	1	0	0	1
131	0	42	0	0	0	0	0	1	0	1	0	0	0	1	0	1	1	1	0	0	1	0	0	1	0	1	0	1
132	0	32	0	0	0	0	0	1	0	0	0	0	0	0	0	1	1	0	0	0	1	0	0	0	0	0	1	1
133	0	38	1	0	0	0	0	60	0	1	0	0	0	1	1	1	1	0	0	0	0	0						0
134	0	63	0	0	0	0	0	24	0	0	1	1	0	0	0	1	1	0	0	0	1	0						0
135	0	49	0	0	0	0	0	156	0	1	1	0	1	0	1	1	1	0	0	0	0	0	0	1	0	1	0	1
136	0	45	0	0	0	0	0	6	0	1	1	0	1	1	0	1	1	0	1	1	0	0	0	1	0	1	0	1
137	0	38	0	0	0	0	0	1	0	0	0	0	0	1	0	1	1	0	1	1	1	0	0	0	0	0	0	1
138	0	44	0	0	0	0	0	1	0	0	1	1	1	1	0	1	1	1	1	0	1	0	0	1	0	1	1	1
139	0	40	0	0	0	0	0	24	1	1	1	0	1	0	1	0	1	0	1	1	1	0	0	0	1	0	1	1
140	0	68	0	0	0	0	0	4	0	1	0	0	0	1	0	1	1	1	1	1	1	0	0	1	0	1	1	1
141	0	57	0	0	0	0	0	12	0	0	0	0	0	0	0	0	1	0	0	0	1	0						0
142	0	45	0	0	0	0	0	1	1	1	1	0	0	1	0	1	1	0	1	1	1	1	1	0	1	0	0	1
143	0	58	0	0	0	0	0		0	1	1	0	1	1	0	1	1	0	1	1	1	0	0	0	0	0	0	1
144	0	32	1	0	0	0	0	3	0	1	0	0	0	1	0	1	1	0	1	1	1	0	1	1	1	1	1	1
145	0	34	1	0	0	1	0	1	0	0	1	0	1	1	0	1	1	0	0	0	1	0	0	0	0	0	1	1
146	0	60	0	0	0	0	0	240	0	1	1	0	1	1	0	1	1	0	0	0	0	0						0
147	0	52	0	0	0	0	0	2	0	0	1	1	1	0	0	1	0	0	0	0	0	0						0
148	0	52	0	0	0	0	0	24	0	1	1	1	1	1	0	1	1	0	1	0	1	0						0
149	0	68	0	0	0	0	0	96	0	0	1	0	1	1	0	1	1	0	0	0	1	0	1	0	1	0	0	1
150	0	47	0	0	0	0	0	96	0	0	1	0	1	1	1	1	1	0	0	0	0	0	0	0	0	0	0	1
151	0	49	0	0	0	0	0	228	0	0	0	0	0	1	1	1	1	1	0	0	1	0	0	1	0	1	0	1
152	0	53	0	0	0	0	0	3	0	1	1	1	1	1	0	1	1	1	1	0	1	0	0	1	1	0	1	1
153	0	53	0	1	0	0	0	60	1	1	0	0	1	1	1	0	1	0	0	0	0	0						0
154	0	42	0	0	0	0	0		0	0	0	0	0	0	0	1	1	0	0	0	1	0	1	0	1	0	0	1
156	0	62	0	1	1	0	0	60	1	0	0	1	0	1	2	1	1	0	0	0	0	0	1	0	1	0	0	1
157	0	47	0	0	0	0	0	36	0	0	1	1	0	0	0	0	1	1	1	0	0	0	0	0	0	0	0	1
158	0	66	0	0	0	0	0	12	0	1	1	0	1	1	0	1	0	0	0	0	0	0						0
159	0	55	0	0	0	0	0	48	0	0	1	1	1	0	1	1	1	1	0	0	0	0	0	1	1	1	0	1
160	0	37	0	0	0	0	0	60	0	0	1	0	1	1	1	1	1	0	1	0	1	0	0	0	0	0	0	1
161	0	45	0	0	0	0	0	24	0	0	0	0	0	0	1	1	1	1	1	0	1	0	0	0	0	0	0	1
162	0	61	1	1	0	0	0	240	0	0	1	0	1	0	0	1	1	0	0	0	0	0						0
163	0	41	0	0	0	0	0		0	0	1	1	1	0	0	1	1	0	0	0	1	0						0
164	0	37	1	0	0	0	0	96	1	1	1	0	0	1	0	1	1	0	0	0	1	0	0	1	0	1	0	1
165	0	61	1	0	0	0	0	240	1	1	1	0	1	1	1	0	1	0	0	0	1	0	0	0	0	0	1	1
166	0	40	0	0	0	0	0		0	0	1	0	1	1	0	1	1	1	0	0	1	0	0	0	1	0	0	1
167	0	35	0	0	0	0	0	12	0	1	1	0	1	1	1	1	1	0	1	0	0	0	1	0	0	0	1	1
168	0	39	0	0	0	0	0		0	0	1	1	1	0	1	1	1	1	1	0	1	0	0	0	0	0	0	1
169	0	38	0	0	0	0	0	86	0	0	1	1	1	0	1	1	1	0	0	0	0	0	0	1	0	0	1	1
170	0	36	1	0	0	0	0	1	1	1	1	0	1	1	0	1	1	0	1	0	0	0	0	1	0	0	1	1
171	0	58	1	0	0	0	0		1	1	1	0	1	1	1	1	1	0	0	0	1	0						0
172	0	27	0	0	0	0	0	100	0	0	1	1	1	0	2	1	1	0	0	0	0	0						0
173	0	21	0	0	0	0	0	24	0	0	0	1	0	0	0	1	1	0	1	0	1	0	0	0	1	0	0	1
174	0	32	0	0	0	0	0	1	0	1	1	1	1	1	0	1	1	0	1	0	1	0	1	0	0	0	0	1
175	0	26	0	0	0	0	0		0	1	1	1	1	1	0	1	1	0	0	0	0	0						0
176	0	69	0	1	0	0	0	18	0	1	1	0	1	1	0	1	0	0	0	0	0	0						0
177	0	69	1	0	0	0	1	12	0	1	1	1	1	1	0	0	1	0	0	0	0	0						0
178	0	49	0	1	0	0	0	18	0	1	1	1	0	1	1	1	1	0	0	0	0	0						0
179	0	59	0	1	0	0	0	72	1	0	1	1	1	1	1	1	0	0	0	0	1	0						0
180	0	52	1	1	0	0	0	132	0	0	1	0	1	1	2	1	1	0	0	0	0	0	0	0	0	0	0	1
181	0	72	0	0	0	0	0		0	1	1	1	0	1	0	0	1	0	0	0	1	0						0
182	0	36	0	0	0	0	0	6	1	1	1	0	1	1	2	1	1	0	0	0	1	0	1	0	1	0	0	1
183	0	49	0	0	0	0	0		1	0	0	0	0	1	1	1	1	0	1	0	1	0	0	1	0	1	0	1
184	0	39	0	0	0	0	0	48	0	0	1	1	1	1	1	1	1	0	0	0	1	0	0	0	1	0	1	1
185	0	50	0	0	0	0	0	36	0	0	1	1	0	0	1	1	1	0	0	0	0	0						0
186	0	22	1	0	0	0	0	3	0	1	0	0	0	0	0	1	1	1	1	0	1	0	1	0	0	0	1	1
187	0	21	0	0	0	0	0	60	1	0	1	1	1	1	0	1	0	0	0	0	0	0						0
188	0	38	1	0	0	0	0	84	1	1	1	0	1	1	2	1	1	0	1	1	1	0	0	0	1	0	1	1
189	0	33	0	0	0	0	0		0	0	0	0	0	0	0	1	0	0	0	0	0	0						0
190	0	32	0	0	0	0	0	36	1	0	0	0	0	1	0	1	1	1	1	0	1	0	0	0	0	0	0	1
191	0	64	0	0	0	0	0	50	1	1	1	0	1	1	1	1	1	1	0	0	0	0	0	0	0	0	0	1
192	0	76	0	0	0	0	0	120	1	1	0	0	0	1	0	1	1	0	1	0	1	0	0	0	0	0	0	1
193	0	73	0	0	0	0	0	3	0	0	1	1	0	1	0	0	1	0	0	0	0	0						0
194	0	46	0	0	0	0	0		0	0	1	1	0	0	0	1	1	0	0	0	0	1						0
195	0	35	0	0	0	0	0		1	1	1	0	1	1	0	1	1	0	0	0	1	0	0	1	0	1	0	1
196	0	55	0	1	0	0	0	24	1	0	1	1	1	1	1	1	1	1	1	0	1	0	0	0	0	0	0	1
197	0	46	1	0	0	0	0		1	0	0	0	0	1	0	1	1	1	1	0	0	0	0	1	0	1	0	1
198	0	71	1	1	0	0	0	40	0	1	1	0	1	1	1	1	1	0	1	1	0	0	0	0	0	0	1	1
199	0	31	1	0	0	0	0	84	1	1	1	0	1	1	2	1	1	0	0	0	0	0						0
200	0	30	0	0	0	0	0	12	1	0	1	1	1	0	0	0	1	0	0	1	1	1	0	1	0	1	0	1
202	0	43	0	0	0	0	0	36	0	1	1	1	1	1	1	1	1	1	1	0	1	0	0	1	1	0	0	1
203	0	40	0	0	0	0	0	24	0	0	1	0	1	1	1	1	1	1	0	0	1	0	0	0	0	0	0	1
204	0	48	0	0	0	0	0		0	0	0	1	0	0	1	1	1	1	1	1	1	0	0	1	1	1	0	1
205	0	55	0	0	0	0	0	84	0	1	1	1	1	1	0	1	1	0	1	0	0	0						0
206	0	50	0	0	0	0	0		0	0	1	1	0	0	0	1	1	1	1	1	1	0	0	0	0	0	0	1
207	0	40	0	0	0	0	0	36	0	1	0	1	0	0	0	1	1	0	0	0	0	0						0
208	0	33	0	0	0	0	0	6	0	0	0	1	0	0	1	1	1	0	0	0	0	0	1	0	1	0	1	1
209	0	46	0	0	0	0	0	36	0	0	1	1	1	0	0	1	0	0	0	0	0	0						0
210	0	61	1	1	0	0	0	256	1	1	1	0	1	1	0	1	1	0	0	0	0	0						0
211	0	61	0	0	0	0	0	48	0	1	1	1	1	1	2	1	1	0	0	0	0	0						0
212	0	42	0	0	0	0	0		0	1	1	0	1	1	1	1	1	0	1	0	1	1	0	0	0	0	0	1
213	0	77	0	0	0	0	0		1	0	1	1	0	1	0	0	1	0	0	0	0	0						0
214	0	73	0	1	0	0	0	24	0	0	1	1	1	1	2	1	1	0	0	0	0	0	0	0	0	0	0	1
215	0	24	0	0	0	0	0		1	1	1	0	1	1	0	1	1	1	1	0	1	0	1	1	1	0	1	1
216	0	41	0	0	0	0	0	15	0	1	1	1	1	1	0	1	1	0	0	0	0	0						0
217	0	68	1	1	1	1	0		0	0	0	0	0	1	0	1	1	1	1	1	1	0	0	1	0	0	0	1
218	0	61	0	0	0	0	0	1	0	1	1	0	0	1	0	1	1	0	1	0	1	0						0
219	0	63	0	0	0	0	0		0	1	1	0	0	1	0	1	1	0	0	0	1	0	1	1	1	1	1	1
220	0	28	0	0	0	0	0		0	1	1	0	0	1	0	1	1	0	0	0	1	1	0	0	0	0	0	1
221	0	41	0	1	0	0	0		0	0	1	1	1	0	0	1	1	0	1	1	0	0	1	0	1	0	1	1
222	0	65	0	0	0	0	0		0	1	1	0	1	1	0	1	1	1	1	0	0	0	0	1	1	1	0	1
223	0	20	0	0	0	0	0	6	0	1	1	0	0	1	0	1	0	0	0	0	0	0						0
224	0	47	0	0	0	0	0	3	0	1	0	0	0	1	0	0	1	1	0	0	0	0	0	1	0	1	1	1
225	0	21	0	0	0	0	0		0	0	0	0	0	0	2	1	1	0	1	0	0	0	0	1	1	0	0	1
226	0	52	0	0	0	0	0	18	0	0	1	1	1	0	0	1	1	0	0	0	0	0						0
227	0	42	0	0	0	0	0	6	0	0	1	1	1	1	0	1	0	0	0	0	0	0						0
228	0	39	0	0	0	0	0	48	0	0	1	1	1	0	0	0	1	1	1	0	1	0	0	0	1	0	0	1
229	0	37	0	0	0	0	0		0	1	1	0	1	1	0	1	1	0	1	0	0	0	1	0	0	0	0	1
230	0	71	0	0	0	0	0		0	1	0	1	0	0	1	1	1	0	0	0	1	0						0
231	0	57	0	0	0	0	0		0	1	0	1	0	0	0	1	1	0	1	0	0	1	0	0	1	0	0	1
232	0	25	0	0	0	0	0	6	0	0	1	1	1	1	2	1	0	0	0	0	0	0						0
233	0	30	0	0	0	0	0		1	1	1	0	0	1	0	1	1	0	1	0	1	0	1	1	1	0	0	1
234	0	65	0	1	0	0	0	3	0	1	1	1	1	1	0	1	1	1	1	0	1	0	1	1	1	1	1	1
235	0	55	1	1	0	1	0		1	1	0	0	0	1	0	1	1	0	0	0	1	0	0	1	1	1	1	1
236	0	53	0	0	0	0	0		0	1	0	0	0	1	0	1	1	1	1	0	0	0	0	0	1	0	0	1
237	0	30	0	0	0	0	0	18	0	0	1	0	1	1	0	0	1	0	0	0	0	0	0	0	0	0	0	1
238	0	53	0	1	0	0	0		0	1	0	0	0	0	0	1	1	1	1	0	1	0	0	0	1	0	0	1
239	0	45	1	0	0	0	0	30	0	1	1	0	0	1	0	0	1	0	1	0	1	0	1	1	1	1	1	1
240	0	30	1	0	0	0	0		0	0	0	0	0	0	2	1	1	1	1	1	1	0	1	0	1	0	0	1
241	0	32	0	0	0	0	0	12	0	0	1	1	1	0	0	1	1	0	0	0	0	0						0
242	0	46	0	0	0	0	0		0	1	0	0	0	0	0	1	1	0	1	1	0	0	0	1	0	1	0	1
243	0	48	1	0	0	0	0	40	0	0	1	0	1	1	1	1	1	0	0	0	0	0	0	0	0	0	0	1
245	0	22	0	0	0	0	0	36	0	0	0	1	0	0	0	1	1	0	0	0	0	0						0
246	0	57	0	0	0	0	0	12	0	0	1	1	1	1	1	1	1	1	1	1	0	0	0	0	0	0	0	1
247	0	52	0	0	0	0	0	72	1	0	1	1	1	0	2	1	1	0	0	0	1	0	0	0	0	0	0	1
248	0	60	0	0	0	0	0	3	1	1	1	0	0	1	0	1	1	0	1	0	1	0	1	0	1	0	0	1
249	0	64	0	1	0	0	0	3	0	0	1	1	0	1	2	1	1	1	0	0	1	0						0
250	0	29	0	0	0	0	0		0	0	1	1	1	1	2	1	0	0	0	0	0	0						0
251	0	51	0	0	0	0	0		0	0	1	1	1	0	0	1	1	1	1	1	1	0	1	1	1	0	1	1
252	0	31	1	0	0	0	0	120	0	0	1	1	1	0	1	1	1	0	0	0	0	0						0
253	0	46	0	0	0	0	0	6	0	0	1	1	1	0	0	1	1	0	1	1	1	0						0
254	0	56	0	1	0	0	0	64	1	0	1	1	1	0	1	1	1	0	1	0	1	0	0	1	0	1	0	1
255	0	43	0	0	0	0	0	48	0	1	1	1	0	1	0	1	1	0	0	0	0	0						0
256	0	28	1	0	0	1	0		0	1	1	0	1	1	1	1	1	0	1	0	0	0	1	0	1	0	0	1
257	0	26	0	0	0	0	0		0	0	1	1	1	1	0	1	1	0	0	0	0	0	1	1	0	0	1	1
258	0	57	0	0	0	0	0	12	0	1	1	1	0	1	0	0	1	0	0	0	0	0	0	0	0	0	1	1
259	0	67	1	1	0	0	0	6	1	1	1	0	1	1	1	1	1	0	0	0	0	0						0
260	0	54	0	0	0	0	0		0	1	1	0	1	1	0	1	1	1	0	0	1	0	0	0	0	0	0	1
261	0	57	0	1	0	0	0		0	1	1	1	1	1	0	1	1	1	1	0	0	0	0	1	0	1	0	1
262	0	59	0	0	0	0	0		1	0	1	0	1	1	1	1	1	1	1	1	1	0	1	1	1	1	0	1
263	0	55	0	0	0	0	0	1	0	1	1	1	1	1	2	1	1	0	1	1	1	0						0
264	0	53	0	1	0	0	0	6	0	0	1	0	0	1	1	1	1	0	0	0	0	0						0
265	0	48	0	0	0	0	0	240	0	0	1	1	1	0	1	1	1	1	1	0	1	0	0	0	0	0	0	1
266	0	51	0	1	0	0	0	60	0	0	1	1	1	1	1	1	1	0	0	0	0	0						0
267	0	32	0	0	0	0	0	48	0	0	0	0	0	0	0	1	1	0	0	0	0	0						0
268	0	29	0	0	0	0	0	36	0	0	1	1	0	1	0	1	1	0	0	0	0	0						0
269	0	32	1	0	0	0	0	36	0	0	0	0	0	0	2	1	1	0	0	0	0	0						0
270	0	37	0	0	0	0	0	4	0	0	1	1	0	0	0	1	1	0	1	0	1	0	1	1	1	1	1	1
271	0	46	0	0	0	0	0	12	0	0	1	1	0	1	0	1	1	0	0	0	0	0	0	0	0	0	0	1
272	0	60	0	1	0	0	0	6	0	1	1	0	0	1	2	1	1	0	0	0	0	0						0
273	0	42	0	0	0	0	0	240	0	0	1	1	1	1	1	1	1	0	1	1	1	0	0	0	0	0	0	1
274	0	54	0	0	0	0	0	12	0	1	1	0	1	1	2	1	1	1	1	0	1	0	0	0	0	0	1	1
275	0	48	0	0	0	0	0		0	1	1	1	0	1	2	1	1	0	0	0	1	0						0
276	0	60	0	0	0	0	0	36	1	0	1	1	0	0	2	1	1	0	0	0	1	0						0
277	0	55	1	1	1	1	1	9	1	0	0	0	0	0	2	0	1	0	0	0	0	0						0
278	0	38	0	0	0	0	0	15	0	0	1	0	0	1	0	1	1	1	1	0	1	0	0	0	0	0	0	1
279	0	47	0	0	0	0	0	6	1	1	1	1	1	1	1	1	1	1	1	0	1	0	0	0	1	0	0	1
280	0	36	0	0	0	0	0	12	0	1	1	1	1	1	2	1	1	1	1	0	1	0	0	1	0	0	0	1
281	0	52	1	0	0	0	0	120	1	1	1	0	1	1	0	1	1	0	0	0	1	0	0	1	1	1	0	1
282	0	23	0	0	0	0	0	36	0	1	1	1	0	1	0	1	0	0	0	1	0	0						0
283	0	58	0	0	0	0	0	4	0	0	1	1	0	0	0	1	1	0	0	0	1	0	0	1	0	1	0	1
284	0	30	0	0	0	0	0	4	0	1	1	1	1	0	0	1	1	1	1	0	0	0	1	1	1	0	0	1
285	0	28	0	0	0	0	0	5	0	0	0	1	0	0	0	1	1	1	1	0	1	1	0	0	1	0	1	1
286	0	30	0	0	0	0	0	2	0	1	1	1	1	1	0	1	1	0	1	1	0	1	0	0	0	0	0	1
287	0	47	0	0	0	0	0	1	0	1	1	1	1	1	0	1	1	0	1	1	0	0	1	0	0	0	0	1
288	0	42	0	0	0	0	0	48	1	0	1	1	1	1	1	1	1	0	0	0	0	0						0
289	0	45	0	0	0	0	0	2	0	1	1	0	1	1	2	1	1	0	1	1	0	0	0	1	1	1	0	1
290	0	48	0	0	0	0	0		0	1	1	0	1	1	0	1	1	0	1	1	1	0	0	1	0	1	0	1
291	0	35	0	1	0	0	0	120	1	1	1	1	1	1	0	1	1	0	0	0	1	0	0	0	1	0	0	1
292	0	28	0	0	0	0	0		0	0	0	1	0	0	0	1	1	1	1	0	1	0	0	1	1	1	0	1
293	0	18	0	0	0	0	0	36	0	0	1	1	0	1	1	1	0	0	0	0	0	0						0
294	0	30	0	0	0	0	0	6	0	0	0	0	0	0	0	1	1	0	1	0	1	0	1	0	0	0	0	1
295	0	56	0	1	0	0	0	36	1	1	0	0	0	1	0	1	1	1	1	1	1	0	0	0	1	0	1	1
296	0	42	0	0	0	0	0	8	0	0	1	1	1	1	1	1	1	1	1	0	1	0	0	0	1	0	0	1
297	0	29	0	0	0	0	0	48	0	0	0	0	0	0	0	1	1	0	1	0	1	0	1	0	0	0	1	1
298	0	47	0	0	0	0	0		1	1	1	1	1	1	2	1	1	1	1	0	1	0	0	0	0	0	0	1
299	0	34	0	0	0	0	0	36	1	0	1	0	1	1	2	1	1	1	1	0	1	0	0	1	1	1	0	1
300	0	51	0	0	1	0	0		0	0	1	0	1	1	0	1	1	1	0	1	0	0	1	0	1	0	1	1
301	0	46	1	0	0	0	0	1	0	1	1	1	1	1	1	1	1	0	0	0	0	0						0
302	0	56	0	0	0	0	0	2	1	1	1	0	1	1	0	1	1	1	1	0	0	0	0	1	1	1	0	1
303	0	56	0	0	0	0	0	120	0	1	0	0	0	1	1	1	1	1	0	0	1	0	0	1	1	1	0	1
304	0	53	0	0	0	0	0	72	0	1	1	0	1	1	1	1	1	0	1	1	1	0	0	0	1	0	1	1
305	0	36	0	0	0	0	0		0	0	0	0	0	0	0	1	1	0	0	1	1	1	1	0	1	0	1	1
306	0	56	0	0	0	0	0	3	0	1	1	0	1	1	0	1	1	0	1	0	0	0	1	0	1	0	0	1
307	0	39	0	0	0	0	0	12	0	1	1	1	1	1	0	1	1	0	1	1	1	0	0	0	1	0	0	1
308	0	71	0	1	0	0	0	2	1	1	1	1	1	1	0	1	1	0	0	0	0	0	1	1	1	0	1	1
309	0	49	0	0	0	0	0	12	0	1	1	1	0	1	0	1	0	0	0	0	0	0						0
310	0	62	0	0	0	0	0		0	1	1	1	1	1	0	1	1	0	1	0	0	1	1	1	1	1	1	1
312	0	37	0	0	0	0	0	24	1	1	1	0	1	1	0	1	1	1	0	0	1	0	0	1	0	1	0	1
313	0	59	0	0	0	0	0	300	0	1	1	0	1	1	1	0	1	1	1	0	1	0	0	1	0	1	1	1
314	0	27	0	0	0	0	0	12	0	0	1	1	0	0	0	1	0	0	0	0	0	0						0
315	0	61	0	1	1	0	0	4	0	0	1	0	1	1	0	1	0	0	0	0	0	0						0
316	0	52	0	0	0	0	0		0	0	0	1	0	0	0	1	1	1	0	0	1	0	0	1	0	1	0	1
317	0	56	0	1	0	0	0	256	1	0	0	1	0	0	0	1	1	0	0	0	0	0	0	0	0	0	0	1
318	0	67	0	0	0	0	0	12	0	1	1	0	1	0	0	1	1	0	0	0	0	0						0
319	0	29	0	0	0	0	0	24	0	1	0	0	0	0	0	1	1	1	1	0	1	1	1	0	1	0	1	1
320	0	26	0	0	0	0	0	3	1	1	0	0	0	1	0	1	1	0	0	0	0	0	0	0	1	0	0	1
321	0	45	1	0	0	0	0	0.5	1	1	0	0	0	1	1	1	1	1	1	0	1	0	0	0	1	0	1	1
322	0	31	0	0	0	0	0	6	0	1	0	0	0	0	0	1	1	1	1	1	1	0	0	0	1	0	0	1
323	0	42	1	1	0	0	0		1	1	1	0	1	1	0	0	1	1	1	1	1	0	1	1	1	0	1	1
324	0	48	0	0	0	0	0	2	0	1	0	0	0	1	0	1	1	1	1	0	0	0	0	0	0	0	0	1
325	0	52	0	1	0	0	0	2	1	1	1	1	1	1	0	1	1	1	1	0	1	0	0	0	1	0	1	1
326	0	31	0	0	0	0	0	5	0	1	1	0	0	1	1	1	1	0	1	0	1	1	0	0	1	0	0	1
327	0	21	0	0	0	0	0	36	0	0	1	1	1	1	1	1	0	0	0	0	0	0						0
328	0	34	0	0	0	0	0	6	0	1	1	1	1	1	1	1	1	1	1	0	1	0	0	0	0	0	0	1
329	0	29	0	0	0	0	0	24	0	1	1	0	1	1	0	1	1	1	1	0	1	0	1	1	0	0	1	1
330	0	52	0	1	0	0	0	1	0	1	0	1	0	1	0	1	1	0	0	0	1	0	0	0	1	0	1	1
331	0	43	0	0	0	0	0		1	0	1	0	1	1	1	1	1	1	1	0	0	0	0	0	0	0	1	1
332	0	56	1	0	0	0	0	72	0	0	0	0	0	0	0	1	1	0	0	0	0	0						0
333	0	62	0	1	0	0	0	256	0	1	1	0	1	1	1	1	1	0	0	0	0	0	0	0	0	0	1	1
334	0	47	0	0	0	0	0		1	1	1	0	0	1	0	1	1	0	0	0	1	0	0	0	0	0	0	1
335	0	35	0	0	0	0	0	48	1	0	1	0	1	0	0	0	1	0	0	0	0	0	0	0	1	0	0	1
336	0	18	0	0	0	0	0	72	0	0	1	1	0	0	0	1	1	0	0	0	0	0						0
337	0	52	1	1	0	0	0	48	0	0	1	1	0	0	0	1	1	0	0	0	0	0						0
338	0	48	0	0	0	0	0	36	0	1	1	0	1	1	0	0	1	0	1	1	1	0	0	1	0	0	1	1
339	0	31	1	0	0	0	0		1	1	1	0	1	1	1	1	1	0	1	0	0	0	0	0	1	0	1	1
340	0	57	0	0	0	0	0	18	0	0	1	1	1	1	0	1	1	1	1	1	1	0						0
341	0	55	1	0	0	0	0	4	0	1	0	0	0	1	1	1	1	0	1	1	0	0	1	0	1	0	1	1
342	0	39	0	0	0	0	0	18	0	0	1	1	1	1	0	1	0	0	0	0	0	0						0
343	0	36	0	0	0	0	0	36	0	1	1	0	1	1	1	1	1	0	1	1	1	0	1	0	0	0	0	1
344	0	25	0	0	0	0	0	5	1	1	1	0	1	1	0	0	1	0	1	0	1	0	1	1	1	1	1	1
345	0	54	0	0	0	0	0		0	1	1	0	1	1	0	1	1	1	1	0	0	0	0	0	0	0	0	1
346	0	41	1	0	0	0	0	120	0	0	0	0	0	1	0	1	1	0	0	0	0	0	0	0	0	0	0	1
347	0	18	0	0	0	0	0	36	0	0	1	0	0	1	0	1	1	0	0	0	0	0						0
348	1	49	0	0	0	0	0	1	1	1	1	1	1	1	0	1	1	1	1	0	0	0	0	1	0	0	0	1
349	1	29	0	0	0	0	0		0	1	1	1	1	1	0	1	1	0	0	1	0	0	0	0	0	0	0	1
350	0	37	0	0	0	0	0	84	0	0	1	1	0	1	2	1	0	0	0	0	0	0						0
351	0	61	0	1	0	0	0	30	0	1	1	1	1	1	0	1	1	0	0	0	1	0						0
352	1	37	0	0	0	0	0	12	0	0	1	1	1	1	0	0	1	0	1	0	1	0	0	1	1	0	0	1
353	1	54	0	0	0	0	0	24	0	1	1	0	0	1	1	1	1	1	0	0	0	0	0	0	0	0	0	1
354	1	31	1	0	0	0	0		1	1	1	0	1	1	0	1	1	0	1	0	1	1	0	1	1	0	0	1
355	1	42	0	0	0	0	0	1	0	1	1	0	1	1	0	1	1	1	1	0	0	0	0	1	1	1	0	1
356	0	48	0	0	0	0	0	2	0	0	1	1	0	0	0	1	1	0	1	1	1	0						0
357	0	37	1	0	0	0	0	1	0	0	1	0	1	1	0	1	1	0	0	0	0	0						0
358	1	59	0	0	0	0	0		0	1	1	1	1	1	0	1	1	1	1	0	1	0	0	0	0	0	0	1
359	1	30	0	0	0	0	0	12	0	1	1	0	1	1	0	1	1	0	1	1	1	0	0	1	0	1	1	1
360	1	35	0	0	0	0	0	36	1	1	1	0	1	1	1	1	1	0	1	0	1	0	0	0	1	0	0	1
361	1	36	0	0	0	0	0		0	0	1	0	0	1	0	1	1	0	1	0	1	0	1	1	1	1	0	1
362	1	37	0	0	0	0	0	3	0	0	1	1	0	0	0	1	1	0	0	0	0	0	0	0	0	0	0	1
363	1	52	0	0	0	0	0		1	0	1	1	0	0	1	1	1	1	1	0	1	0	0	1	1	1	0	1
364	1	38	0	0	0	0	0	24	0	1	1	0	1	1	0	1	1	1	1	0	1	0	0	1	1	1	1	1
365	1	47	0	0	0	0	0		0	1	1	0	0	1	0	1	1	0	0	0	1	0	1	1	1	1	0	1
366	1	48	0	0	0	0	0		0	0	0	0	0	0	0	1	1	1	1	0	1	1	0	0	0	0	1	1
367	0	22	0	0	0	0	0	8	1	0	1	1	1	0	0	1	0	0	0	0	0	0						0
368	1	43	0	0	0	0	0	7	0	1	1	0	1	1	0	0	1	1	1	0	1	0	0	1	0	1	1	1
369	0	26	0	0	0	0	0	40	0	0	0	0	0	0	0	1	1	0	0	0	0	0						0
370	1	39	0	0	0	0	0	2	1	1	1	0	1	1	0	1	1	1	0	0	1	0	0	1	1	1	0	1
371	0	67	0	0	0	0	0	100	0	1	1	1	1	1	0	1	1	0	0	0	0	0						0
372	0	56	0	0	0	0	0	3	0	1	0	0	0	1	0	1	1	0	0	0	1	0						0
373	0	27	0	0	0	0	0	12	0	0	1	1	0	0	0	1	0	0	0	0	0	0						0
374	0	31	0	0	0	0	0	36	1	1	1	1	0	1	0	1	1	0	0	0	0	0						0
375	1	68	0	0	0	0	0	360	0	1	1	1	1	1	0	1	1	1	1	0	1	0	0	1	0	0	0	1
376	1	42	0	0	0	0	0	2	0	0	1	1	1	1	0	1	1	0	1	0	1	0	0	1	0	1	0	1
377	1	47	1	0	0	1	0	2	1	1	1	0	1	1	0	1	1	1	0	0	0	0	0	0	1	0	1	1
378	1	41	0	0	0	0	0		0	1	1	1	1	0	0	1	1	0	1	1	1	0	1	1	1	0	1	1
379	1	56	0	0	0	0	0	120	0	1	0	1	0	1	0	1	1	0	0	0	1	0	1	1	0	1	1	1
380	0	22	0	0	0	0	0	120	0	1	1	0	0	1	1	1	1	0	0	0	0	0						0
381	1	61	1	0	0	0	0	120	0	1	1	0	1	1	1	1	1	0	0	0	0	0	0	0	0	0	0	1
382	0	66	0	1	0	0	0	12	1	0	1	1	0	1	0	0	1	0	1	0	0	0						0
383	1	36	0	0	0	0	0	120	0	1	1	1	1	1	0	1	0	0	0	0	0	0	0	0	0	0	0	1
384	0	45	0	0	0	0	0	180	0	1	1	1	1	1	0	1	1	0	0	0	0	0						0
385	1	38	0	0	0	0	0	12	1	1	1	0	1	1	0	0	1	1	1	0	0	1	1	0	0	0	1	1
386	1	57	0	0	0	0	0	18	0	0	1	1	0	0	0	1	1	1	0	0	0	0	0	1	0	0	0	1
388	1	29	0	0	0	0	0	60	0	1	1	0	1	1	1	1	1	1	1	1	1	1	1	0	0	0	0	1
389	1	31	1	0	0	0	0		1	1	1	1	1	1	0	1	1	0	1	0	0	0	1	1	1	1	1	1
390	1	42	1	0	0	0	0		0	1	1	0	1	1	0	1	1	1	1	1	0	1	0	0	1	0	0	1
391	0	29	0	0	0	0	0		0	0	0	1	0	0	0	1	1	0	0	0	0	0						0
392	1	36	1	0	0	0	0	3	0	0	0	1	0	0	0	1	1	1	1	0	1	1	0	1	1	0	1	1
393	1	59	0	1	0	0	0	2	1	1	1	1	1	1	0	1	1	0	0	0	1	0	0	0	0	0	1	1
394	0	59	0	0	0	0	0	12	0	1	1	1	1	1	0	0	1	0	0	0	0	0						0
395	1	62	0	0	1	0	0	5	0	1	1	0	1	1	0	1	1	0	0	0	1	1	1	0	1	0	0	1
396	1	45	0	1	0	0	0		1	0	1	1	0	0	0	1	1	1	1	1	1	0	0	0	1	0	0	1
397	1	55	0	1	0	0	0	12	0	1	1	1	1	1	1	1	1	1	0	0	1	0	0	0	0	0	0	1
398	1	51	0	1	0	0	0	6	1	0	1	1	1	0	0	1	1	1	1	1	1	0	0	0	0	0	0	1
399	1	37	0	0	0	0	0	60	0	0	1	0	1	1	0	1	1	1	1	0	0	0	0	1	0	1	1	1
400	1	42	1	0	0	0	0		0	0	1	1	1	0	1	1	1	0	1	0	0	0	0	0	0	0	1	1
402	1	55	0	0	0	0	0		1	1	1	1	1	1	1	1	1	1	1	0	0	0	0	0	1	0	1	1
403	0	28	1	0	0	0	0	12	0	0	1	0	1	0	0	1	0	0	0	0	0	0						0
404	1	62	0	1	1	0	0	8	1	1	1	1	1	1	0	1	1	0	1	0	0	0	0	1	0	1	0	1
405	0	63	0	0	0	0	0	228	0	0	1	1	1	0	1	1	1	0	1	0	0	0						0
406	1	39	0	0	0	0	0	48	1	1	1	0	1	1	1	1	1	0	1	1	1	0	0	0	0	0	0	1
407	0	52	0	0	0	0	0	120	0	0	1	1	0	0	1	1	1	0	0	0	0	0						0
408	1	54	0	0	0	0	0	2	0	1	1	1	1	1	0	1	1	1	0	0	0	0	0	0	0	0	0	1
409	1	37	0	0	0	0	0	50	0	0	0	0	0	0	1	1	1	1	1	0	1	0	0	0	0	0	0	1
410	1	29	1	0	0	0	0	36	0	0	0	0	0	0	1	1	1	0	0	0	1	0	1	1	1	0	1	1
411	1	39	0	0	0	0	0		1	0	0	0	0	1	1	1	1	1	1	0	1	0	0	0	0	0	0	1
412	0	22	0	0	0	0	0	120	0	0	0	1	0	0	1	0	0	0	0	0	0	0						0
413	1	55	0	0	0	0	0	24	0	1	1	0	1	1	0	1	1	0	0	0	0	0	0	1	1	1	0	1
414	0	76	0	0	0	0	0		0	0	1	1	0	1	0	1	1	0	0	0	0	0						0
415	1	63	0	1	0	0	0	6	0	1	1	0	1	1	1	1	1	0	1	0	0	0	0	0	0	0	0	1
416	1	39	0	0	0	0	0	72	1	0	1	0	1	0	1	1	1	0	1	0	1	0	0	0	0	0	0	1
417	1	31	0	0	0	0	0	2	0	1	1	1	1	1	1	1	1	0	1	0	1	1	1	0	1	0	1	1
418	1	62	0	1	0	0	0		1	0	1	1	0	0	0	1	1	1	1	0	0	0	1	0	1	0	0	1
419	1	56	0	1	0	0	0	60	0	0	1	0	1	1	0	1	1	0	1	0	0	0	0	0	0	0	0	1
420	1	43	1	0	0	0	0	60	0	1	1	0	1	1	0	1	1	1	1	0	1	0	0	0	0	0	0	1
421	1	34	0	0	0	0	0	24	0	1	1	0	1	1	1	1	1	0	1	0	1	0	0	0	0	0	0	1
422	1	44	0	0	0	0	0	18	0	1	1	0	1	1	1	1	1	1	1	0	1	0	0	0	0	0	0	1
423	1	30	0	0	0	0	0	12	0	1	1	1	0	1	1	1	1	1	1	0	1	0	0	0	1	0	1	1
424	1	61	0	0	0	0	0	2	1	1	1	0	1	1	0	1	1	1	1	0	0	0	0	0	1	0	1	1
425	1	40	0	0	0	0	0	144	0	0	0	0	0	0	1	0	1	1	1	0	1	0	0	1	1	1	0	1
426	1	48	0	0	0	0	0	3	1	0	1	1	1	0	1	1	1	1	1	0	1	1	0	1	1	1	0	1
427	1	43	0	0	0	0	0		0	0	0	0	0	1	1	1	1	1	1	0	1	0	0	1	1	1	1	1
428	1	35	0	0	0	0	0	6	1	1	0	0	0	1	0	1	1	1	0	0	0	0	0	1	0	1	0	1
429	1	55	1	0	0	1	0		1	1	1	0	1	1	0	1	1	0	1	0	1	1	0	1	1	0	1	1
430	1	44	0	0	0	0	0	36	0	1	1	0	1	1	0	1	1	1	1	0	0	0	0	1	1	1	1	1
431	1	48	0	1	0	0	0	72	1	1	1	0	1	1	1	1	1	1	1	1	1	0	0	1	1	1	0	1
432	1	57	0	0	0	0	0		0	1	1	0	0	1	1	1	1	1	0	0	1	0	0	1	0	1	0	1
433	1	59	0	0	0	0	0	2	1	1	1	1	1	1	1	1	1	0	1	1	1	0	1	1	1	0	1	1
434	0	42	0	0	0	0	0	204	0	0	1	1	1	0	2	0	1	0	0	0	0	0						0
435	0	47	0	0	0	0	0	156	0	0	1	1	1	0	2	1	1	0	1	1	0	0						0
436	0	57	1	0	0	0	0	48	0	0	0	0	0	0	0	1	1	0	1	0	1	0						0
437	0	21	0	0	0	0	0	48	0	1	1	1	0	0	0	1	1	0	0	0	0	0						0
438	0	39	0	0	0	0	0		0	0	0	0	0	0	0	0	1	0	1	0	1	0						0
439	0	54	0	0	0	0	0	192	0	0	0	1	0	0	0	1	1	0	0	0	0	0						0
440	0	47	0	0	0	0	0	12	0	0	1	1	1	0	1	1	1	0	0	0	0	0						0
441	0	18	0	0	0	0	0	60	0	0	0	0	0	0	1	1	1	0	0	0	0	0						0
442	0	18	1	0	0	0	0	36	0	0	0	0	0	0	1	1	1	0	0	0	0	0						0
443	0	51	1	0	0	0	0	256	0	0	0	0	0	0	0	1	1	0	0	0	0	0						0
444	1	24	0	0	0	0	0	84	0	0	0	1	0	0	0	1	1	0	0	0	1	0						0
445	1	60	0	0	0	0	0	24	1	0	1	0	1	0	1	1	1	0	0	0	0	0						0
446	1	49	0	0	0	0	0	48	0	0	1	0	0	1	0	1	1	1	1	1	1	0						0
447	1	50	0	1	0	0	0	360	1	0	0	0	0	1	0	1	1	0	0	0	0	0						0
448	1	23	0	0	0	0	0	120	0	0	1	1	1	1	1	1	0	0	0	0	0	0						0
449	1	69	1	1	0	0	0	2	0	1	0	1	0	1	0	1	1	0	0	0	0	0						0
450	1	25	0	0	0	0	0	96	1	0	1	0	0	1	0	1	0	0	0	0	0	0						0
451	1	62	1	0	0	0	0	204	0	0	1	1	1	1	0	0	1	0	0	0	0	0						0
452	1	31	0	0	0	0	0	72	0	0	1	1	0	1	0	1	1	0	0	0	0	0						0
453	1	36	0	0	0	0	0	12	0	0	1	1	1	1	0	1	1	0	0	0	0	0						0
454	1	29	0	0	0	0	0	60	0	0	1	1	1	1	2	1	1	0	0	0	0	0						0
455	1	36	1	1	0	0	0	18	0	0	1	1	1	1	1	1	1	0	1	0	1	0						0
456	1	74	0	1	1	0	0	36	1	0	1	1	0	1	0	0	1	0	0	0	0	0						0
457	1	18	1	0	0	0	0	84	1	0	1	0	1	1	0	1	0	0	0	0	0	0						0
458	1	65	0	0	0	0	0	500	0	0	1	1	1	1	0	1	1	0	0	0	0	0						0
459	1	36	0	0	0	0	0	60	0	1	1	0	0	1	0	1	0	0	0	0	0	0						0
460	1	20	0	0	0	0	0	24	0	0	1	1	1	1	0	1	0	0	0	0	0	0						0
461	1	62	0	0	0	0	0	12	0	1	1	1	1	1	0	1	1	0	0	0	1	0						0
462	1	50	0	0	0	0	0	3	0	0	1	0	0	1	0	1	1	0	1	1	1	0						0
463	1	30	0	0	0	0	0	10	0	1	1	1	1	1	0	1	1	0	0	0	0	0						0
464	1	51	0	0	0	0	0	4	0	1	1	0	1	1	2	1	1	0	0	0	1	0						0
465	1	64	1	0	0	0	0	3	0	1	1	0	1	1	1	1	1	0	0	0	0	0						0
466	1	27	1	0	0	0	0	24	0	1	1	1	1	1	0	1	1	0	0	0	0	0						0
467	1	45	0	0	0	0	0	120	0	1	1	1	1	1	0	1	0	0	0	0	0	0						0
468	1	61	0	0	0	0	0	180	0	1	1	0	1	1	2	0	1	0	1	1	0	0						0
469	1	26	0	0	0	0	0	12	0	1	1	1	1	1	0	1	0	0	0	0	0	0						0
470	1	60	0	0	1	0	0	24	0	1	1	0	1	1	0	1	1	0	0	0	0	0						0
471	1	57	0	1	0	0	0	12	0	1	1	0	0	1	0	0	1	0	0	0	0	0						0
472	1	29	0	0	0	0	0	60	0	0	0	0	0	0	0	1	1	0	0	0	0	0						0
473	1	44	0	0	0	0	0	120	0	0	1	1	0	1	0	1	1	0	0	0	1	0						0
474	1	23	0	0	0	0	0	4	0	0	1	1	1	0	0	1	1	1	1	0	1	0	1	1	1	0	1	1
475	1	37	0	0	0	0	0		0	0	1	1	0	0	0	1	1	1	1	0	1	0	1	1	1	1	0	1
476	1	41	0	0	0	0	0	240	1	1	0	1	0	0	1	0	1	0	1	0	0	0	0	0	1	0	0	1
478	1	33	0	0	0	0	0	12	0	0	0	1	0	0	2	0	1	1	0	1	0	0	0	0	0	0	0	1
479	1	56	0	0	0	0	0	48	0	0	1	1	1	0	1	1	1	0	1	0	0	0	0	0	0	0	0	1
480	1	18	0	0	0	0	0	18	0	0	1	1	1	0	0	1	1	0	1	0	1	1	1	0	1	0	1	1
481	1	63	1	1	1	0	0	60	0	0	0	0	0	0	0	1	1	0	0	0	0	0	0	0	1	0	0	1
482	1	46	0	0	0	0	0	24	1	1	0	1	0	0	1	1	1	1	0	1	0	0	0	0	1	0	0	1
483	1	52	1	0	0	0	0	2	1	0	1	1	1	1	0	1	1	0	0	1	1	0	0	0	0	0	0	1
485	1	32	0	0	0	1	0	120	0	1	1	1	1	1	1	1	1	0	1	1	1	0	0	0	1	0	0	1
486	1	54	0	0	0	0	0	12	0	0	1	1	1	1	1	1	1	1	1	0	1	0	0	0	1	0	1	1
487	1	66	1	0	1	0	0	12	0	0	1	1	0	1	0	1	1	0	0	0	0	0	1	1	1	0	0	1
488	1	50	0	0	0	0	0	18	1	1	1	0	1	1	0	0	1	0	1	0	0	0	1	1	1	0	0	1
490	1	35	0	0	0	0	0	5	0	1	1	1	1	1	1	1	1	1	1	1	0	0	0	1	1	1	1	1
491	1	56	0	0	0	0	0	15	0	1	1	0	1	1	0	1	1	0	0	0	1	0	0	0	1	0	0	1
492	1	40	0	0	0	0	0	1	0	1	1	0	1	1	0	1	1	0	0	0	0	0	0	1	0	1	1	1
493	1	32	0	0	0	0	0	2	0	1	0	0	0	1	0	0	1	0	0	1	0	1	1	0	1	0	1	1
494	1	42	0	1	0	0	0	144	1	1	1	1	1	1	2	1	1	0	1	1	1	1	0	0	0	0	1	1
495	1	56	0	0	0	0	0	12	0	1	1	1	1	1	1	1	1	1	1	1	1	0	0	1	1	1	0	1
496	1	50	0	0	0	0	0	120	0	1	1	0	1	1	1	0	1	0	1	1	1	0	0	0	0	0	0	1
497	1	47	0	0	0	0	0	30	1	1	1	0	1	1	1	1	1	0	1	1	1	0	0	1	1	0	0	1
498	1	62	0	0	1	0	0	240	1	1	1	1	1	1	1	1	1	1	1	0	1	1	0	0	1	0	0	1
499	1	49	0	0	0	0	0		1	1	1	1	1	1	0	1	1	1	1	0	0	0	0	0	0	0	0	1
500	1	55	0	0	0	0	0	96	0	1	1	0	1	1	0	1	1	0	1	1	1	0	0	0	0	0	0	1
501	1	46	0	0	0	0	0	4	0	1	1	0	1	1	2	1	1	1	1	0	1	1	0	0	0	0	0	1
502	1	41	0	0	0	0	0	0.5	1	0	1	0	0	1	1	0	1	0	1	0	1	0						0
503	1	46	0	0	0	0	0	256	0	0	1	1	0	0	1	0	1	0	0	0	0	0						0
504	1	27	1	0	0	0	0	12	0	0	0	1	0	0	1	1	1	0	0	0	1	0						0
505	1	25	0	0	0	0	0	240	0	0	1	0	1	1	1	1	1	0	0	0	0	0						0
506	1	43	0	0	0	0	0	180	0	0	1	1	0	1	1	1	1	0	0	0	1	0						0
508	1	37	0	0	0	0	0	6	0	0	0	1	0	0	0	1	1	0	0	0	0	0						0
509	1	57	0	0	0	0	0	24	0	0	1	1	1	0	1	0	1	0	0	0	1	0						0
510	1	50	0	0	0	0	0	60	1	0	1	1	1	1	1	0	1	0	0	1	1	0						0
511	1	40	0	0	0	0	0	72	1	0	1	0	1	1	1	1	0	0	0	0	0	0						0
512	1	46	0	0	0	0	0	72	0	0	1	1	1	0	1	1	1	0	0	0	1	0						0
513	1	58	0	0	0	0	0	36	0	0	1	1	1	0	1	1	1	0	0	0	0	0						0
514	1	53	0	0	0	0	0	120	0	0	1	1	0	0	1	1	1	0	0	0	1	0						0
516	1	59	1	0	0	0	0	30	1	0	1	0	0	1	1	0	1	0	0	0	0	0						0
518	1	64	0	0	0	0	0	360	0	0	0	1	0	0	1	1	1	0	0	0	1	0						0
519	1	60	0	0	0	0	0	12	0	0	1	1	1	0	1	1	1	0	0	0	1	0						0
520	1	59	0	0	0	0	0	60	0	0	1	0	1	1	1	1	1	0	0	0	1	1						0
522	1	46	1	0	0	0	0	120	0	0	1	0	1	1	1	1	1	0	1	0	1	0						0
523	1	85	0	1	0	0	0	2	0	0	1	1	1	1	1	1	1	0	0	0	0	0						0
524	1	62	0	1	0	0	0	36	1	0	1	1	1	0	1	1	1	0	0	0	0	0						0
525	1	50	0	0	0	0	0	72	0	0	1	1	1	0	1	1	1	0	0	0	0	1						0
526	1	43	0	0	0	0	0	3	0	0	0	1	0	0	0	0	1	0	1	0	0	0						0
527	1	34	0	0	0	0	0	144	0	0	1	1	1	1	1	0	1	0	0	0	0	0						0
528	1	54	0	0	0	0	0	48	0	0	1	1	1	0	1	0	1	0	0	0	0	0						0
530	1	56	0	1	0	0	0	12	0	0	1	0	1	0	1	1	1	0	0	0	0	0						0
531	1	41	1	0	0	0	0	48	1	0	0	0	1	0	1	1	1	1	0	0	1	0						0
532	1	28	0	0	0	0	0	2	0	0	1	1	0	0	1	1	1	0	0	0	0	0						0
533	1	58	0	0	0	0	0	24	0	0	1	1	1	1	1	0	1	1	0	0	1	0						0
534	1	21	1	0	0	0	0	3	1	0	1	1	0	0	1	1	1	0	0	0	1	0						0
536	1	50	0	0	0	0	0	36	0	0	0	1	0	0	1	1	1	0	0	0	1	0						0
537	1	48	0	0	0	0	0	256	0	0	0	1	0	0	1	1	1	0	0	0	0	0						0
538	1	52	0	1	0	0	0	12	0	0	1	1	1	0	1	1	1	0	1	0	1	0						0
539	1	34	1	0	0	0	0	64	0	0	1	1	1	0	1	1	1	0	0	0	0	0						0
540	1	58	0	0	0	0	0	2	0	0	1	1	0	1	1	1	1	0	0	0	1	0						0
541	1	28	0	0	0	0	0	72	0	0	1	1	1	1	1	1	1	0	0	0	0	0						0

## Sheet: code book
	0	1	2
gender	Female	Male
hypertension	without hypertension	with hypertension
diabete	without diabete	with diabete
overweight	No	Yes
drinking	No	Yes
smoking	No	Yes
TAG_level	Low	High
TC_level	Low	High
HDL_level	Low	High
LDL_level	Low	High
VLDL_level	Low	High
TSH level	Low	Normal	High
Trab level	Low	High
nodules in thyroid	No	Yes
Aspect ratio imbalance	No	Yes
Irregular borders	No	Yes
Irregular shape	No	Yes
Hypoechogenicity	No	Yes
Microcalcifications	No	Yes
tumor size	<10mm	>=10mm
Multifocality	No	Yes
ETE	No	Yes
Bilaterality	No	Yes
LNM	No	Yes
cancer	No	Yes
